# Supplementary material for: Genome-Wide Investigation of SBT Family Genes in Pineapple and Functional Analysis of AcoSBT1.12 in Floral Transition
Source: Front Genet. 2021 Sep 7;12:730821. doi: 10.3389/fgene.2021.730821 (PMC8452990; doi:10.3389/fgene.2021.730821)
Supplement: Supplementary Table 2 — The multilevel consensus sequence and description of 10 motifs. [file Table_2.XLSX]

## Sheet: Sheet1
Supplementary Table S2.The multilevel consensus sequence and describle of 10 motifs.
Type	Multilevel consensus sequence	Describe
Motif1	RRXTFN[IF]ISGTSM[AS][CTA]PHV[SA]G[IV][AV]AL[LI]K[SA]AHPDWSPAAI[KR]SA[IL]MTTA[DY][TV]VDN	Members of the peptidases S8 (subtilisin and kexin) and S53 (sedolisin) family include endopeptidases and exopeptidases.
Motif2	SPRDTDGHGTHT[AS]S[TI]AAG[NS]FV	Members of the peptidases S8 (subtilisin and kexin) and S53 (sedolisin) family include endopeptidases and exopeptidases.
Motif3	[NST][PG]GILKPD[IV][IL][AG]PGVNILAAW[PS]	Members of the peptidases S8 (subtilisin and kexin) and S53 (sedolisin) family include endopeptidases and exopeptidases.
Motif4	[FL][DA][YM]G[AS]GHV[ND]PN[RKA]ALDPGL[VI]YD	Unknown
Motif5	X[FY]GE[GD]V[IV][IV]GV[LI]DTG[IV]WPE[HS]PSF	Members of the peptidases S8 (subtilisin and kexin) and S53 (sedolisin) family include endopeptidases and exopeptidases.
Motif6	[VL]SNXAPW[IV][LI]TV[GA]A[SG][TS][IT]DRRF[PR]	Members of the peptidases S8 (subtilisin and kexin) and S53 (sedolisin) family include endopeptidases and exopeptidases.
Motif7	SGCF[AD][SA]D[IV]LA[AG][IF]D[ADQ]A[IV]ADGVD[VI][LI]SLS[LI]GG	Members of the peptidases S8 (subtilisin and kexin) and S53 (sedolisin) family include endopeptidases and exopeptidases.
Motif8	AXGTA[RAS]G[MG]APRA[RH][LVI]A[IVA]YK[VA]CW	Members of the peptidases S8 (subtilisin and kexin) and S53 (sedolisin) family include endopeptidases and exopeptidases.
Motif9	[YFL][YF]DDPIA[IV][GA][AS][FL][AH]AVE[KR]G[VI]FV[SV]C[SA]AGNSG	Members of the peptidases S8 (subtilisin and kexin) and S53 (sedolisin) family include endopeptidases and exopeptidases.
Motif10	YSYRH[VA][FI]SGFAARL[TS][EP]X[EQ][AL][AE]A[LM]SRXPG	Inhibitor_I9 super family: The subtilisin propeptides are known to function as molecular chaperones, assisting in the folding of the mature peptidase, but have also been shown to act as 'temporary inhibitors'.
